# Supplementary material
Source: PubMed Central journal article supplement (PMC5866246)
Supplement: NIHMS944917-supplement-5.pdf [file NIHMS944917-supplement-5.pdf]

Figure S5

**A**

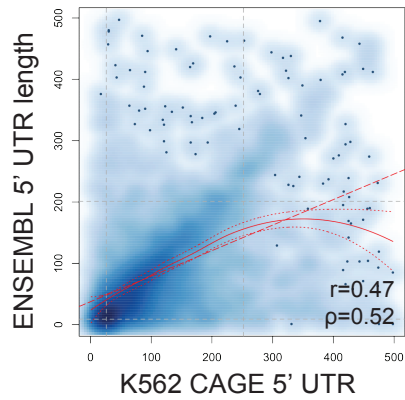

**B**

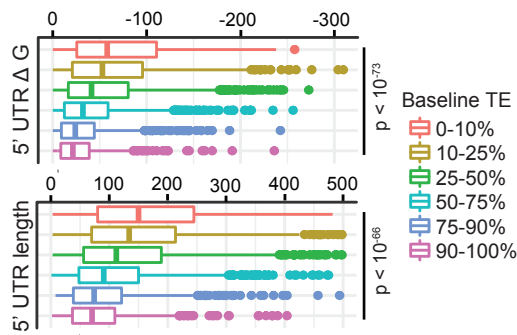

**C**

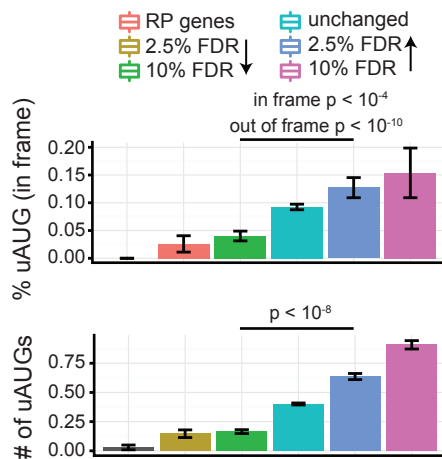

**D**

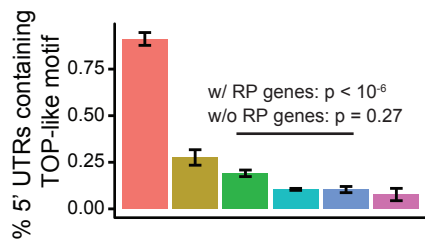

**E**

| 5' UTR      | L  | k | mm | ROCc | PRc  |
|-------------|----|---|----|------|------|
| all         | 6  | 4 | 1  | 0.59 | 0.19 |
| all         | 8  | 6 | 2  | 0.58 | 0.17 |
| all         | 10 | 8 | 3  | 0.56 | 0.17 |
| first 30nts | 6  | 4 | 1  | 0.51 | 0.14 |
| first 30nts | 8  | 6 | 2  | 0.54 | 0.15 |
| first 30nts | 10 | 8 | 3  | 0.52 | 0.16 |
| last 30 nts | 6  | 4 | 1  | 0.51 | 0.14 |
| last 30 nts | 8  | 6 | 2  | 0.52 | 0.15 |
| last 30 nts | 10 | 8 | 3  | 0.50 | 0.14 |

**F**

entire 5' UTR

| Motif | P-value | log P-value | % of Targets | % of Background |
|-------|---------|-------------|--------------|-----------------|
|       | 1e-6    | -1.542e+01  | 4.02%        | 0.76%           |
|       | 1e-5    | -1.269e+01  | 8.43%        | 3.55%           |
|       | 1e-5    | -1.254e+01  | 1.61%        | 0.09%           |

first 30nts of 5' UTR

| Motif | P-value | log P-value | % of Targets | % of Background |
|-------|---------|-------------|--------------|-----------------|
|       | 1e-9    | -2.237e+01  | 3.41%        | 0.25%           |
|       | 1e-8    | -2.028e+01  | 4.62%        | 0.72%           |
|       | 1e-7    | -1.710e+01  | 2.41%        | 0.15%           |

last 30nts of 5' UTR

| Motif | P-value | log P-value | % of Targets | % of Background |
|-------|---------|-------------|--------------|-----------------|
|       | 1e-8    | -1.857e+01  | 1.81%        | 0.00%           |
|       | 1e-7    | -1.718e+01  | 2.21%        | 0.10%           |
|       | 1e-6    | -1.520e+01  | 3.01%        | 0.40%           |
