# Supplementary material
Source: PubMed Central journal article supplement (PMC5866246)

# Figure S1

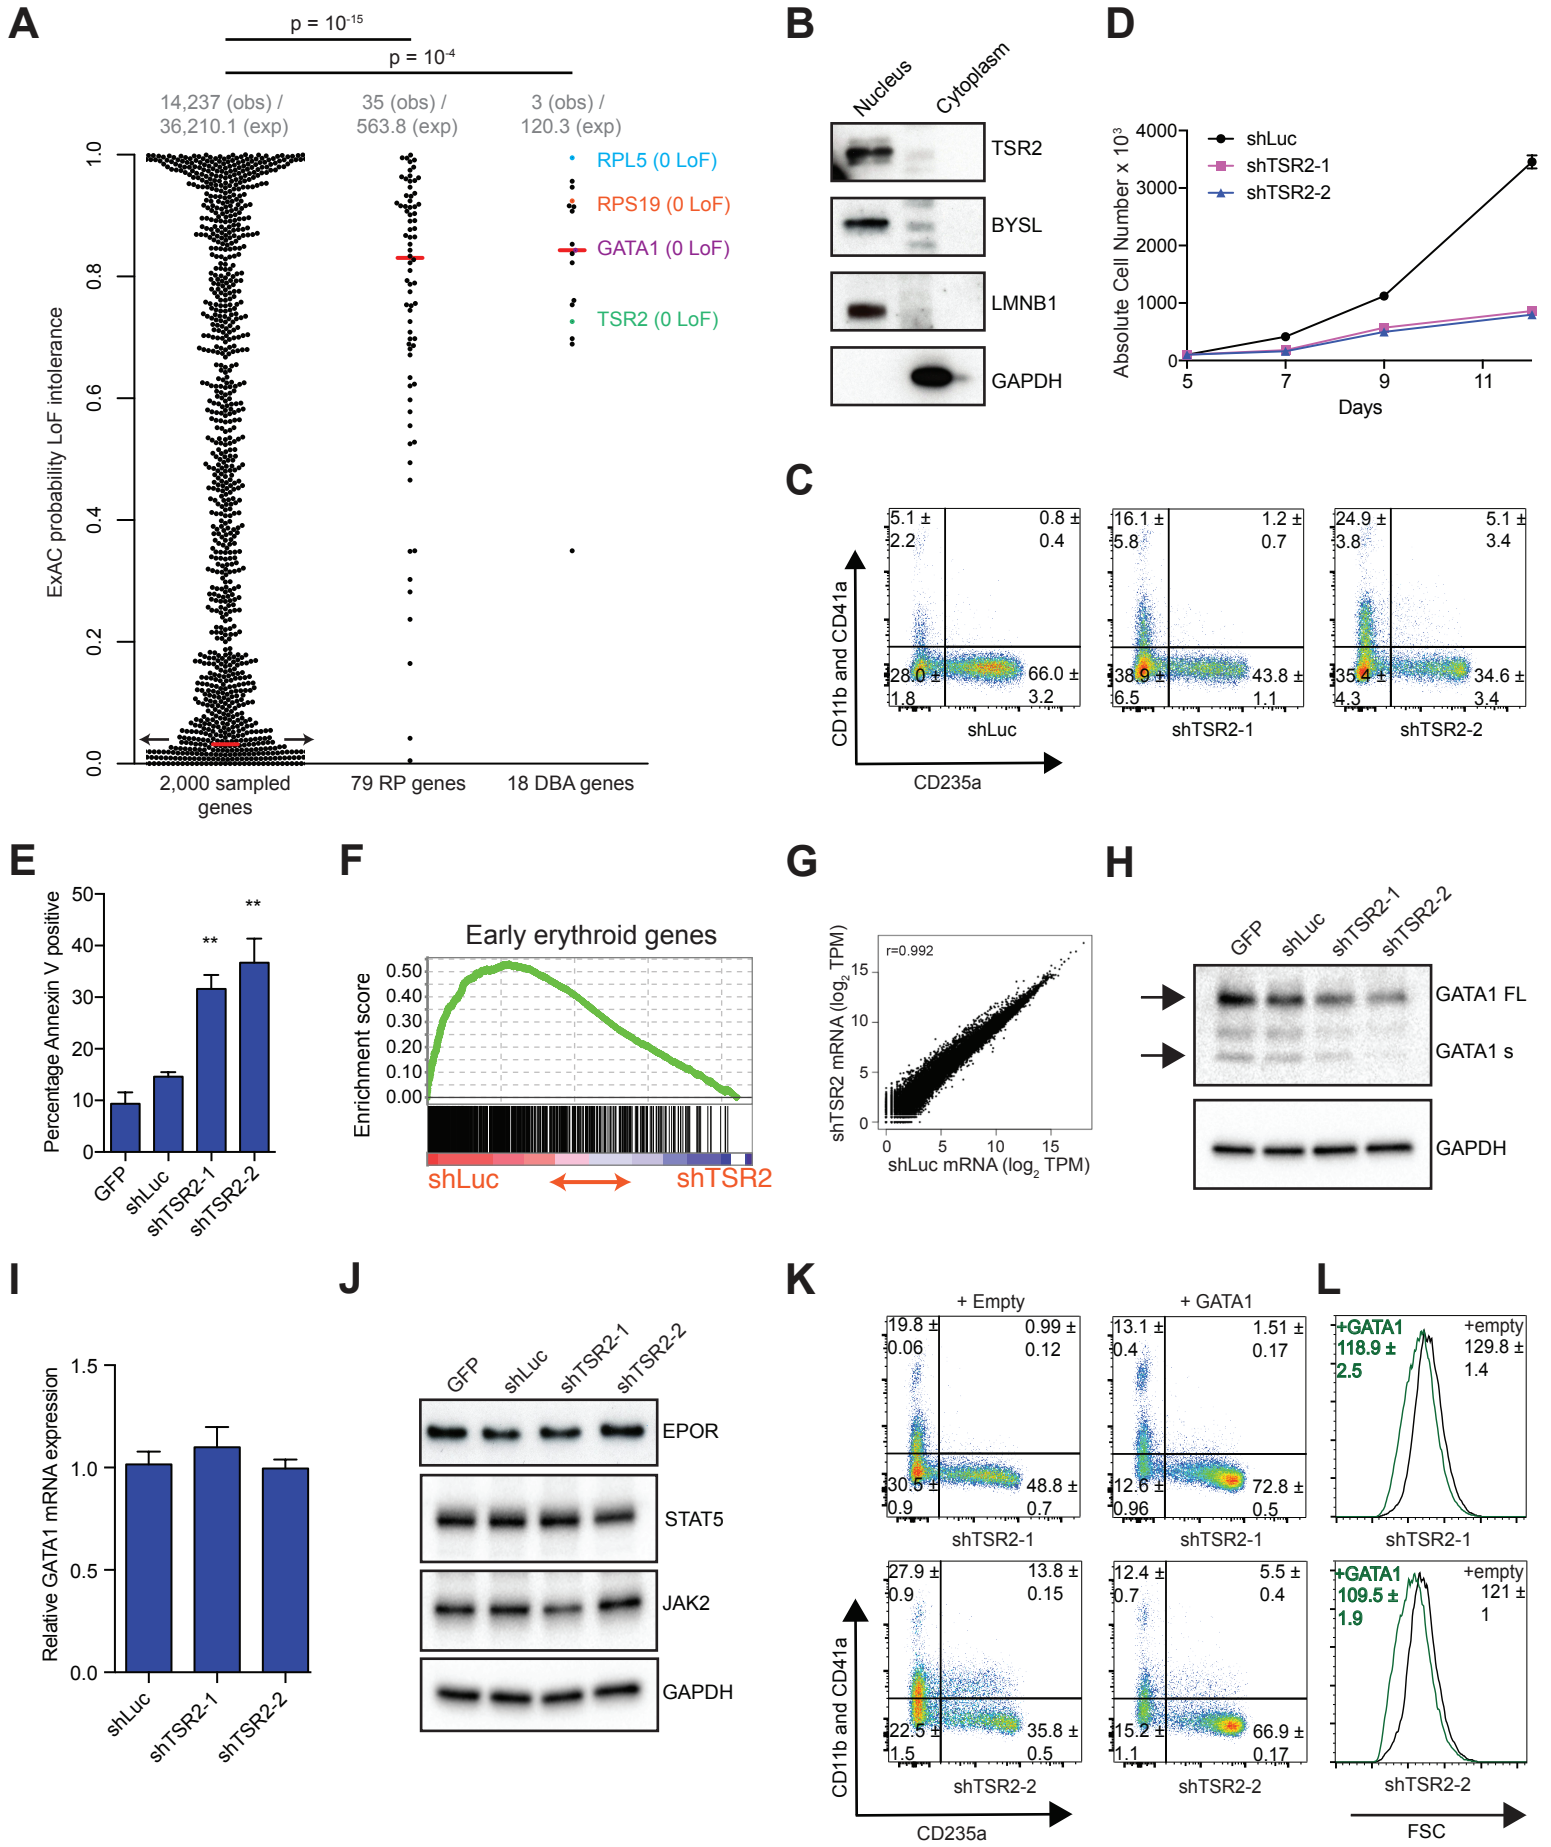

Supplement: NIHMS944917-supplement-1.pdf [file NIHMS944917-supplement-1.pdf]

# Figure S2

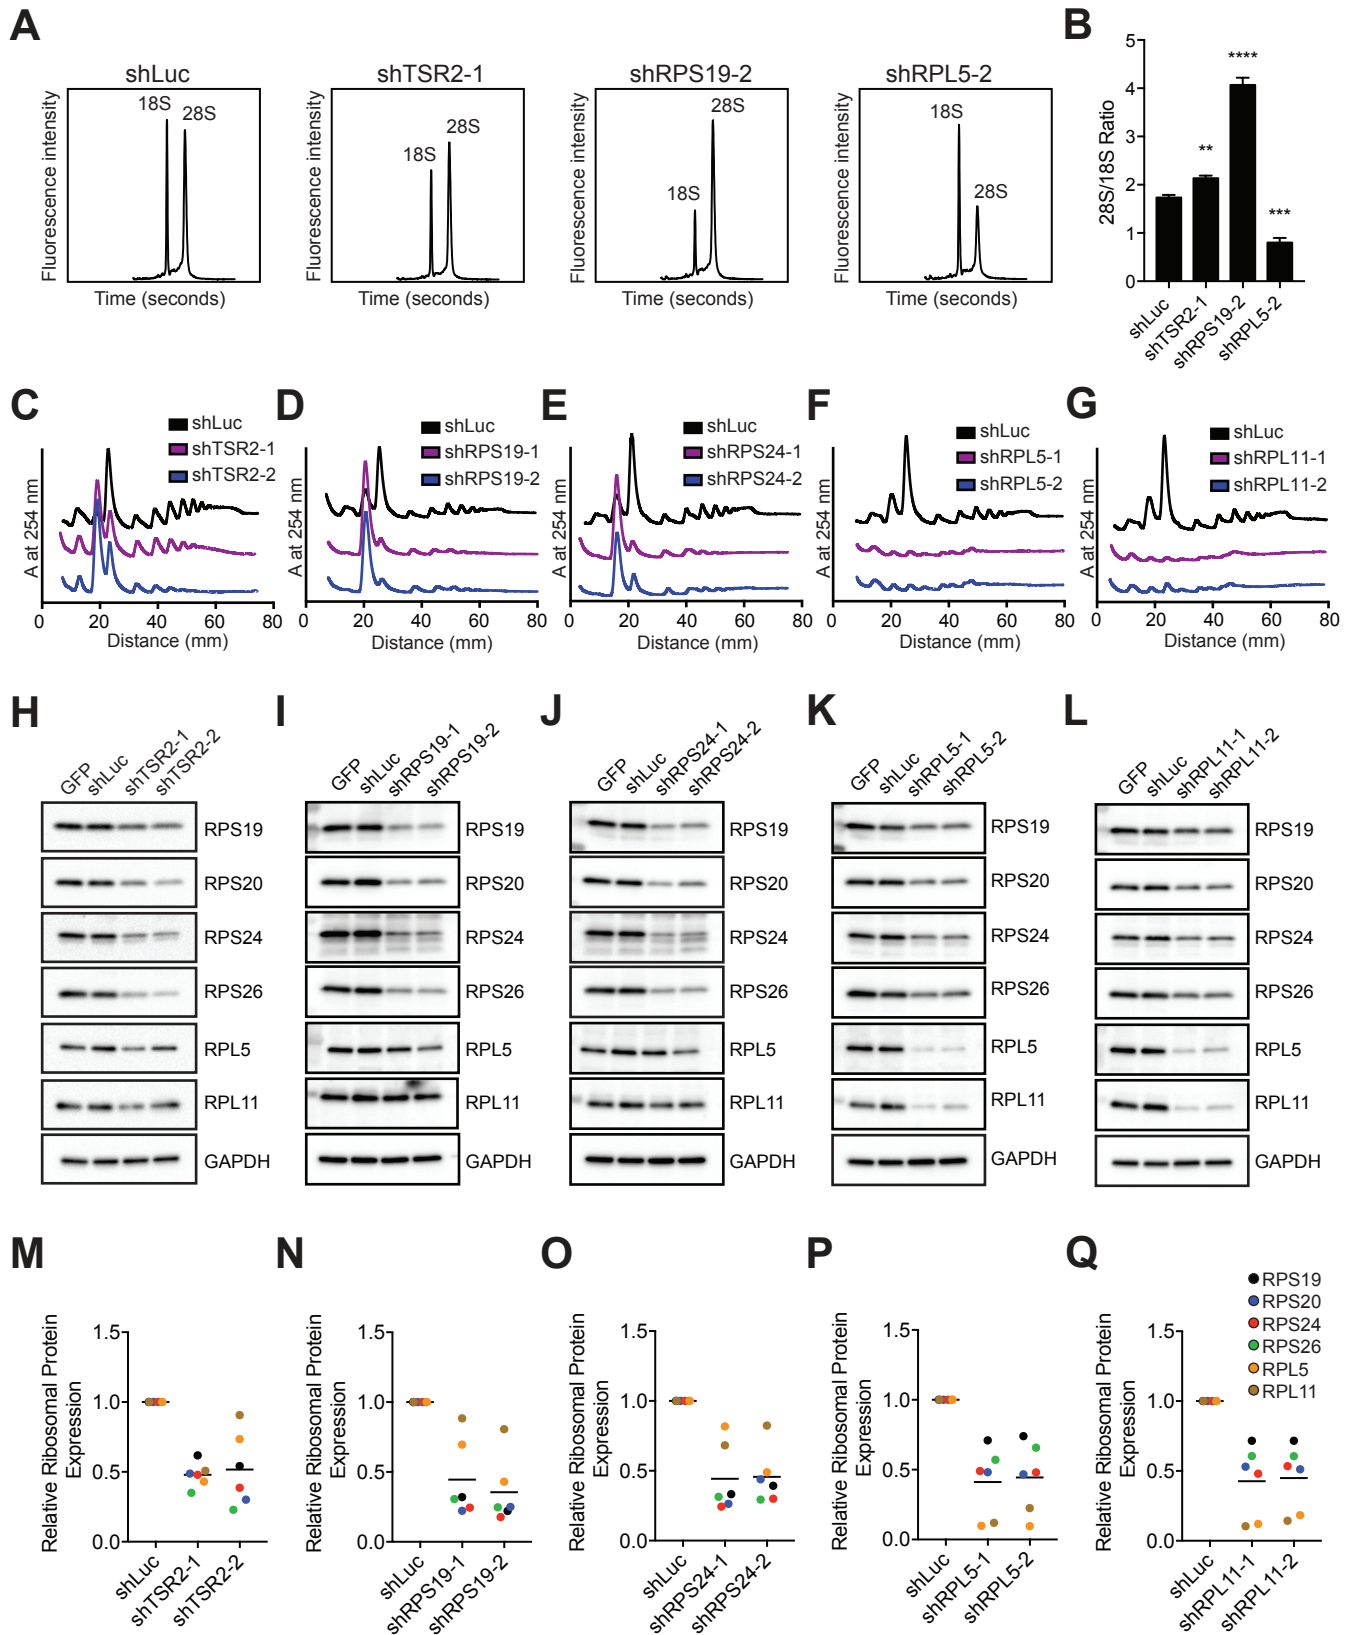

Supplement: NIHMS944917-supplement-2.pdf [file NIHMS944917-supplement-2.pdf]

Figure S3

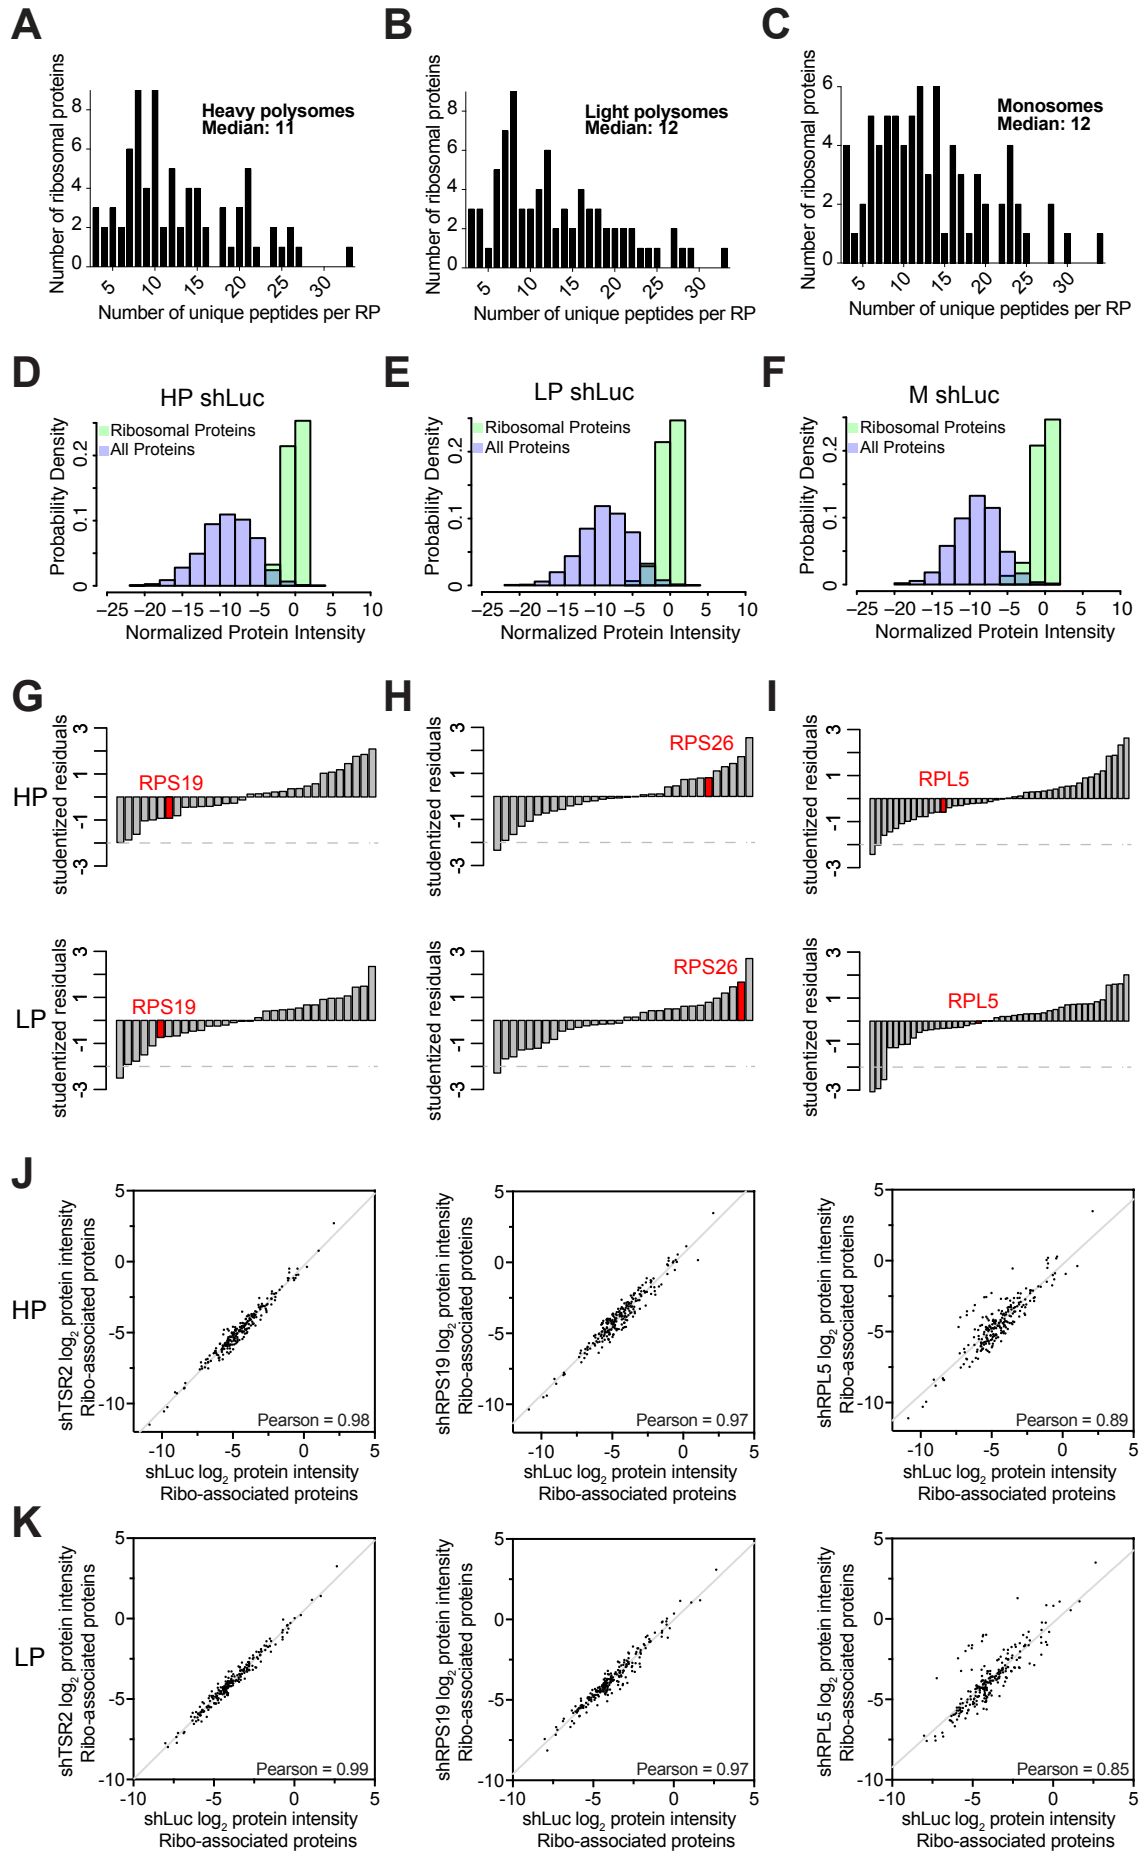

Supplement: NIHMS944917-supplement-3.pdf [file NIHMS944917-supplement-3.pdf]

Figure S4

**A**

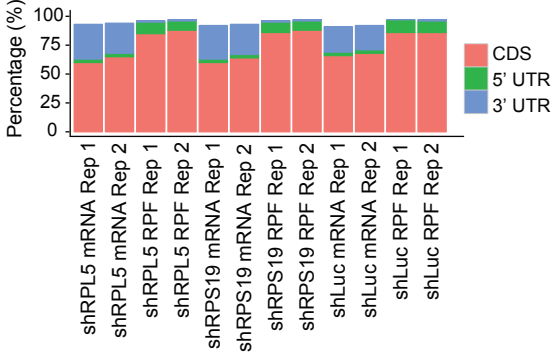

**B**

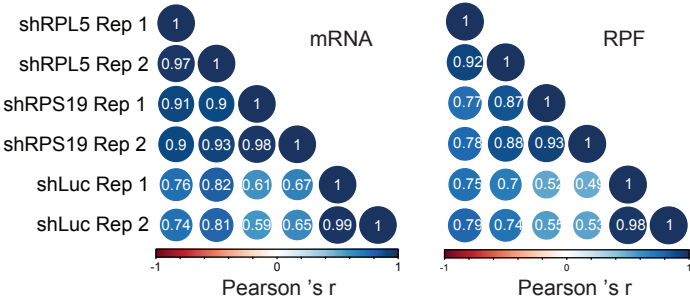

**C**

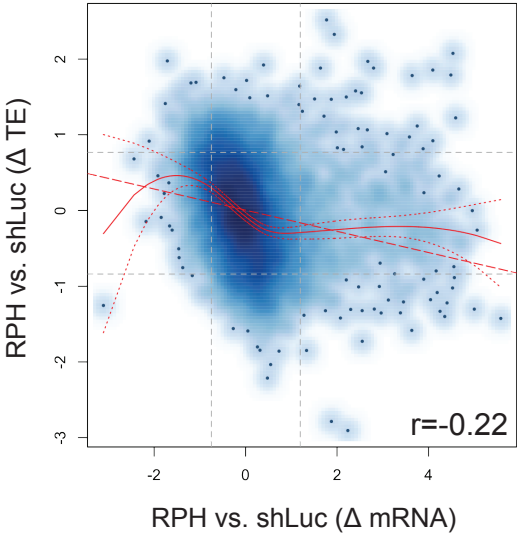

**D**

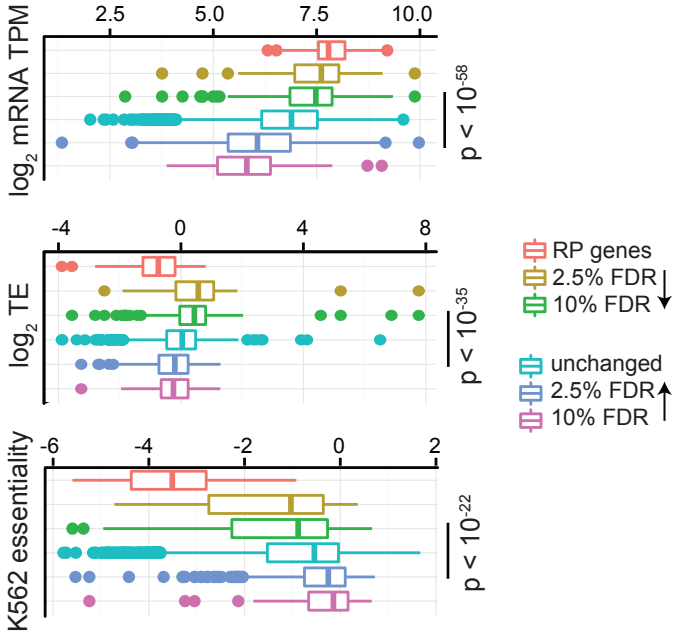

Supplement: NIHMS944917-supplement-4.pdf [file NIHMS944917-supplement-4.pdf]

Figure S6

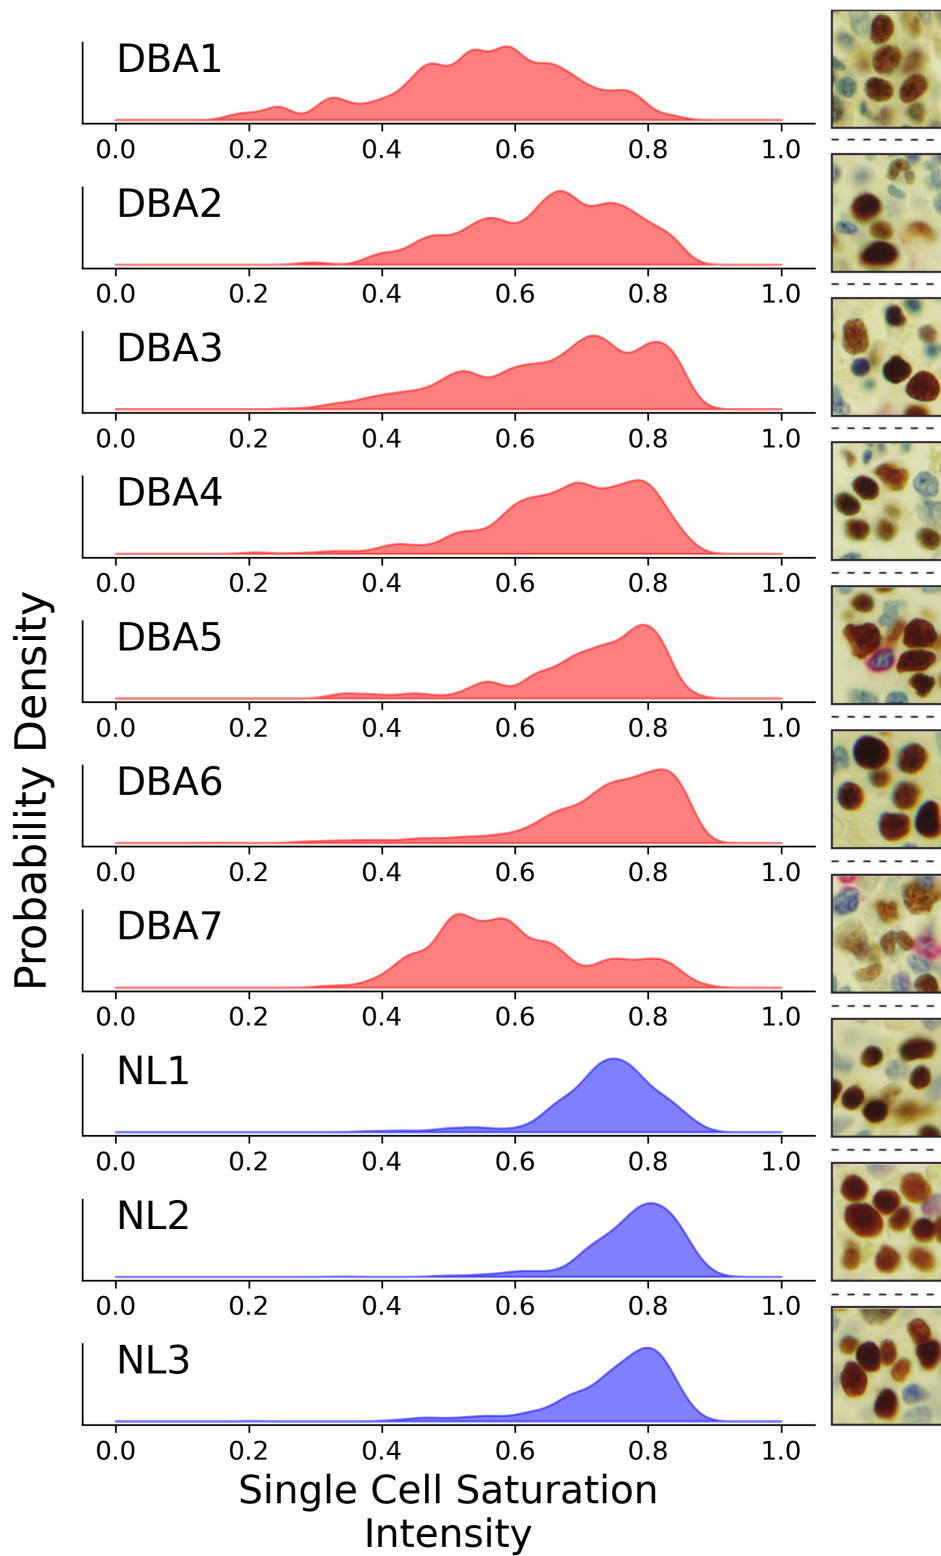

Supplement: NIHMS944917-supplement-6.pdf [file NIHMS944917-supplement-6.pdf]

Figure S7

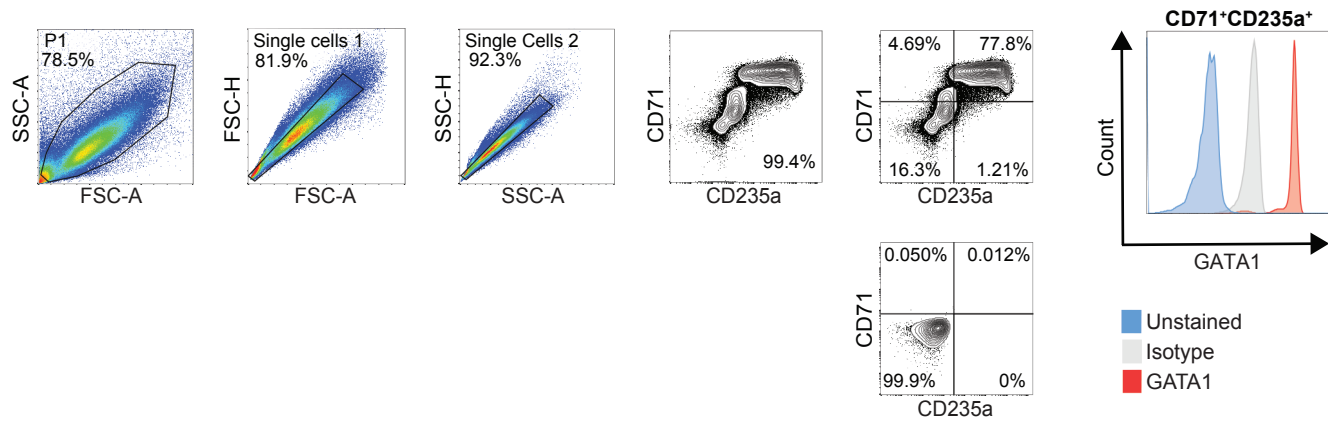

Supplement: NIHMS944917-supplement-7.pdf [file NIHMS944917-supplement-7.pdf]
